# Supplementary material for: Macrophage-specific MHCII expression is regulated by a remote Ciita enhancer controlled by NFAT5
Source: PubMed Central journal article supplement — J Exp Med. 2018 Nov 5;215(11):2901–18. doi: 10.1084/jem.20180314 (PMC6219740; doi:10.1084/jem.20180314), 2018-11-05
Supplement: JEM_20180314_sm.pdf [file JEM_20180314_sm.pdf]

Supplemental material

Buxadé et al., <https://doi.org/10.1084/jem.20180314>

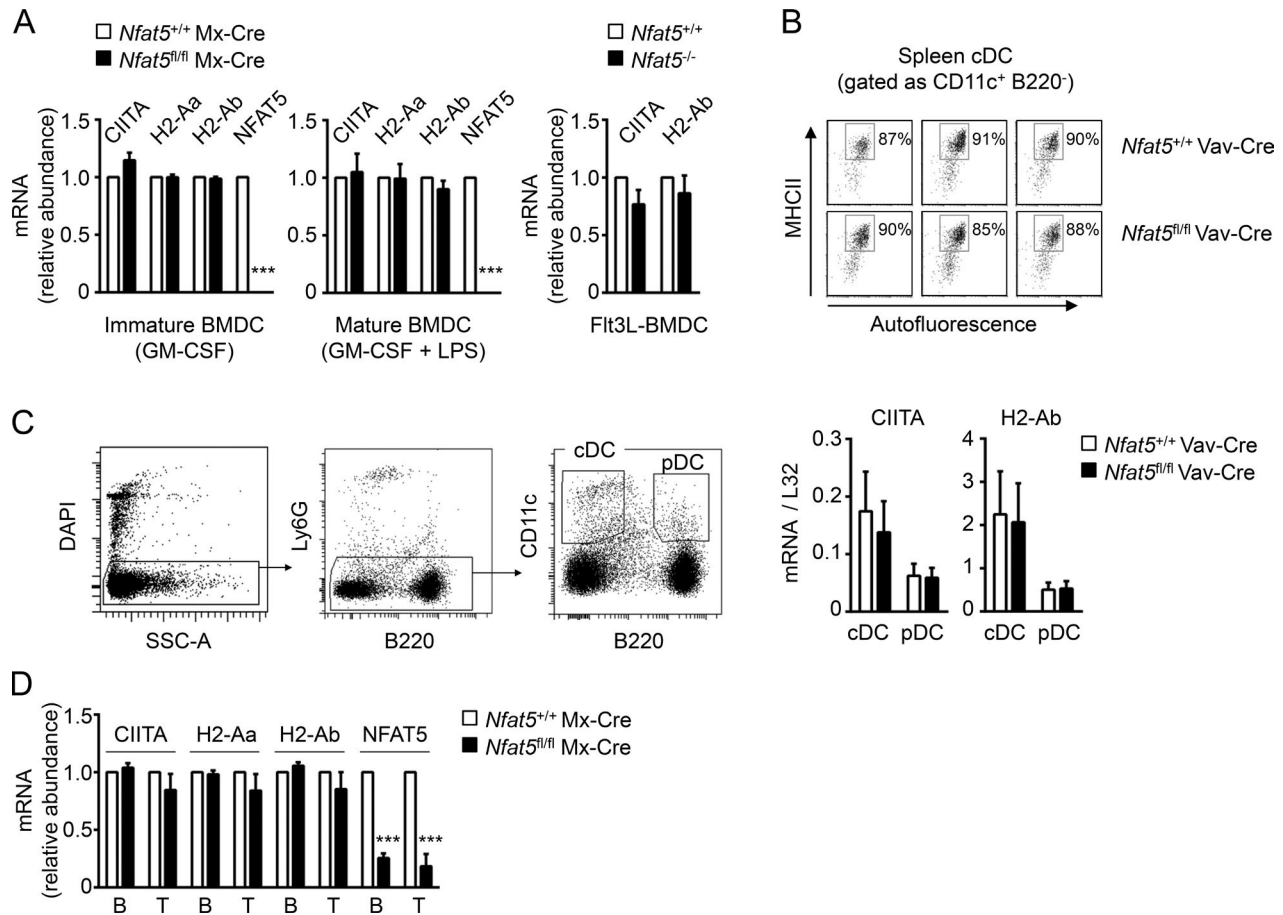

Figure S1. **Expression of MHCII-related genes in NFAT5-deficient DCs and B and T lymphocytes.** (A) CIITA and MHCII mRNA expression in wild-type and NFAT5-deficient BMDCs with GM-CSF or Flt3L. Immature BMDCs were derived by culture with GM-CSF, and mature BMDCs were induced from immature cells by treatment with LPS. Results are the mean  $\pm$  SEM of three independent experiments for GM-CSF-induced BMDCs and another three for Flt3L-induced cells, each comparing one wild-type and one NFAT5-deficient littermate. \*\*\*,  $P < 0.001$ . (B) MHCII surface expression in conventional myeloid DCs (cDCs) isolated from spleens of mice lacking NFAT5 in hematopoietic lineages (*Nfat5*<sup>fl/fl</sup> Vav-Cre) and control mice (*Nfat5*<sup>+/+</sup> Vav-Cre). Results from three mice of each genotype are shown. (C) Sorting strategy and analysis of CIITA and MHCII mRNA levels in cDCs and plasmacytoid DCs (pDCs) isolated from the spleen of mice lacking NFAT5 in blood lineages (*Nfat5*<sup>fl/fl</sup> Vav-Cre) and control mice (*Nfat5*<sup>+/+</sup> Vav-Cre). mRNA analysis (mean  $\pm$  SEM) shows the result of three independent sorting experiments, each comprising one wild-type mouse and one *Nfat5*<sup>fl/fl</sup> Vav-Cre littermate. (D) CIITA and MHCII mRNA expression in splenic B and CD4<sup>+</sup> T lymphocytes (T) from *Nfat5*<sup>fl/fl</sup> Mx-Cre and control mice. Results are the mean  $\pm$  SEM of three independent experiments, each comparing B and T lymphocytes from one NFAT5-deficient mouse and one wild-type littermate. Data for each respective mRNA in A and B are shown normalized to wild-type cells, which were given a value of 1. Statistical significance was determined with a one-sample *t* test.



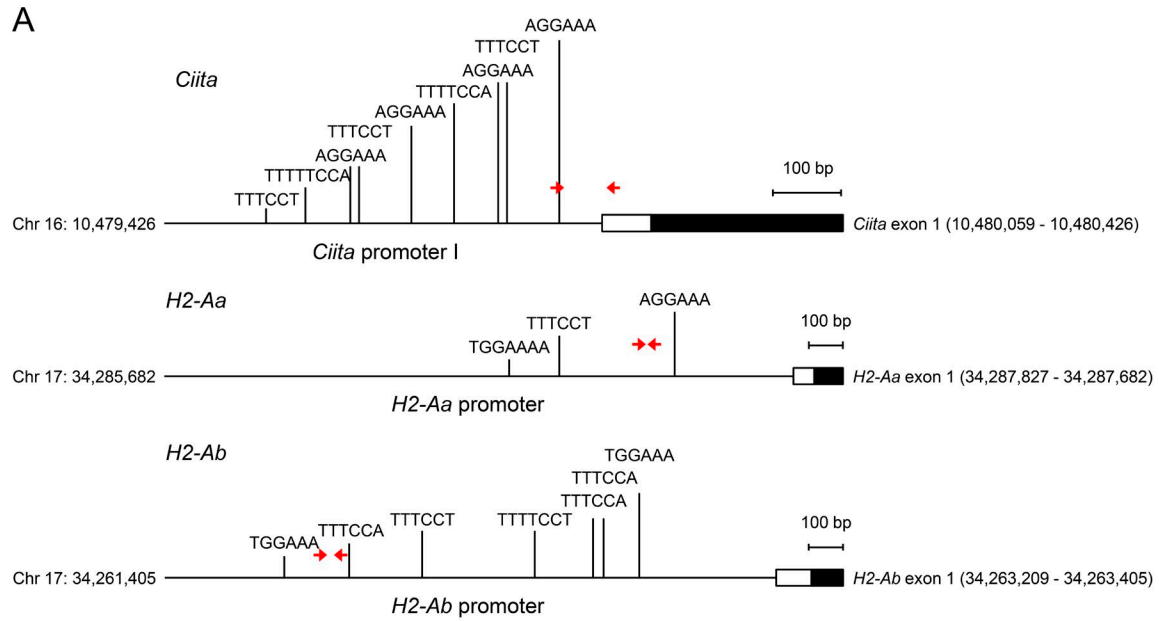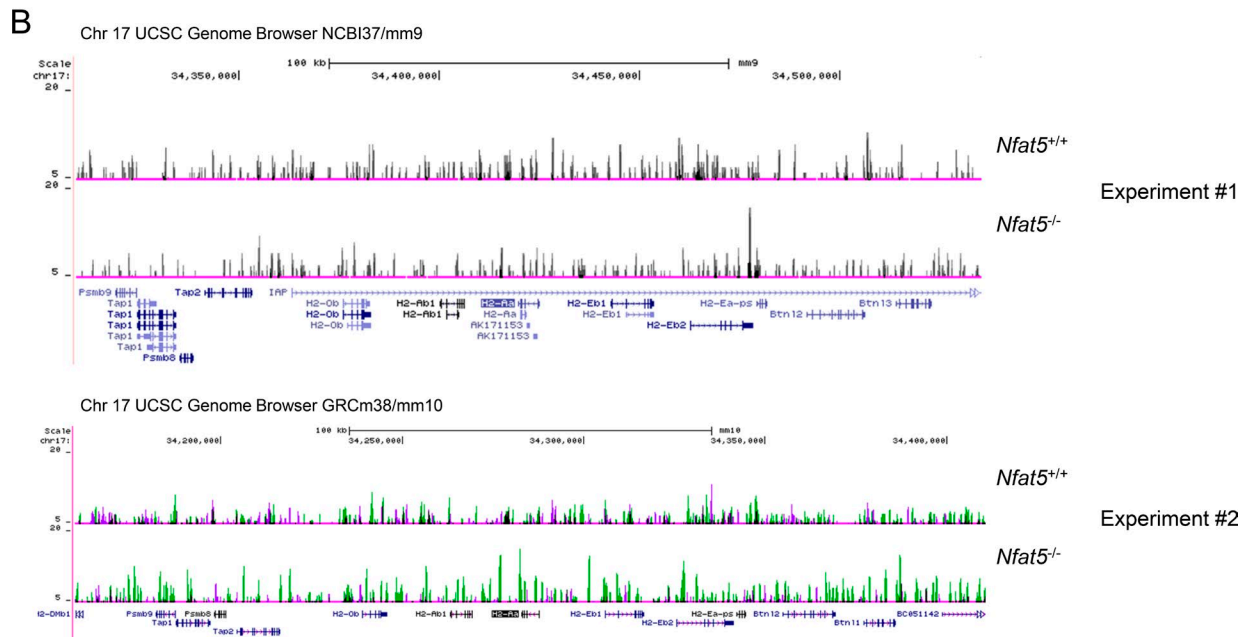

Figure S3. **Potential NFAT5 binding sites in the promoters of *Ciita* and MHCII genes and NFAT5 ChIP-seq analysis in the MHCII locus region. (A)** Diagram illustrating the presence of potential NFAT5 consensus binding sites ([A/T]GGAAA) in promoter regions of *Ciita* and MHCII genes *H2-Aa* and *H2-Ab*. Exon 1 of each gene is depicted. Sequences were obtained from Ensembl (NM\_001243760.2 for *Ciita*, ENSMUST00000040655.12 for *H2-Aa*, and ENSMUST00000040828.5 for *H2-Ab*). Red arrows indicate the positions of primers used to amplify the immunoprecipitated chromatin in Fig. 4 A. **(B)** ChIP-seq analysis of NFAT5 binding to the MHCII locus region in wild-type and NFAT5-deficient BMDMs. Graphics correspond to the two independent ChIP-seq experiments shown in Fig. 4 B. The bottom panel includes the density of sequencing reads for whole chromatin (peaks in purple) before ChIP with anti-NFAT5 antibodies (green peaks). These experiments show no evident binding of NFAT5 in the chromatin regions analyzed. The accession numbers for these datasets are GSE107948 (upper panel) and GSE107950 (lower panel).



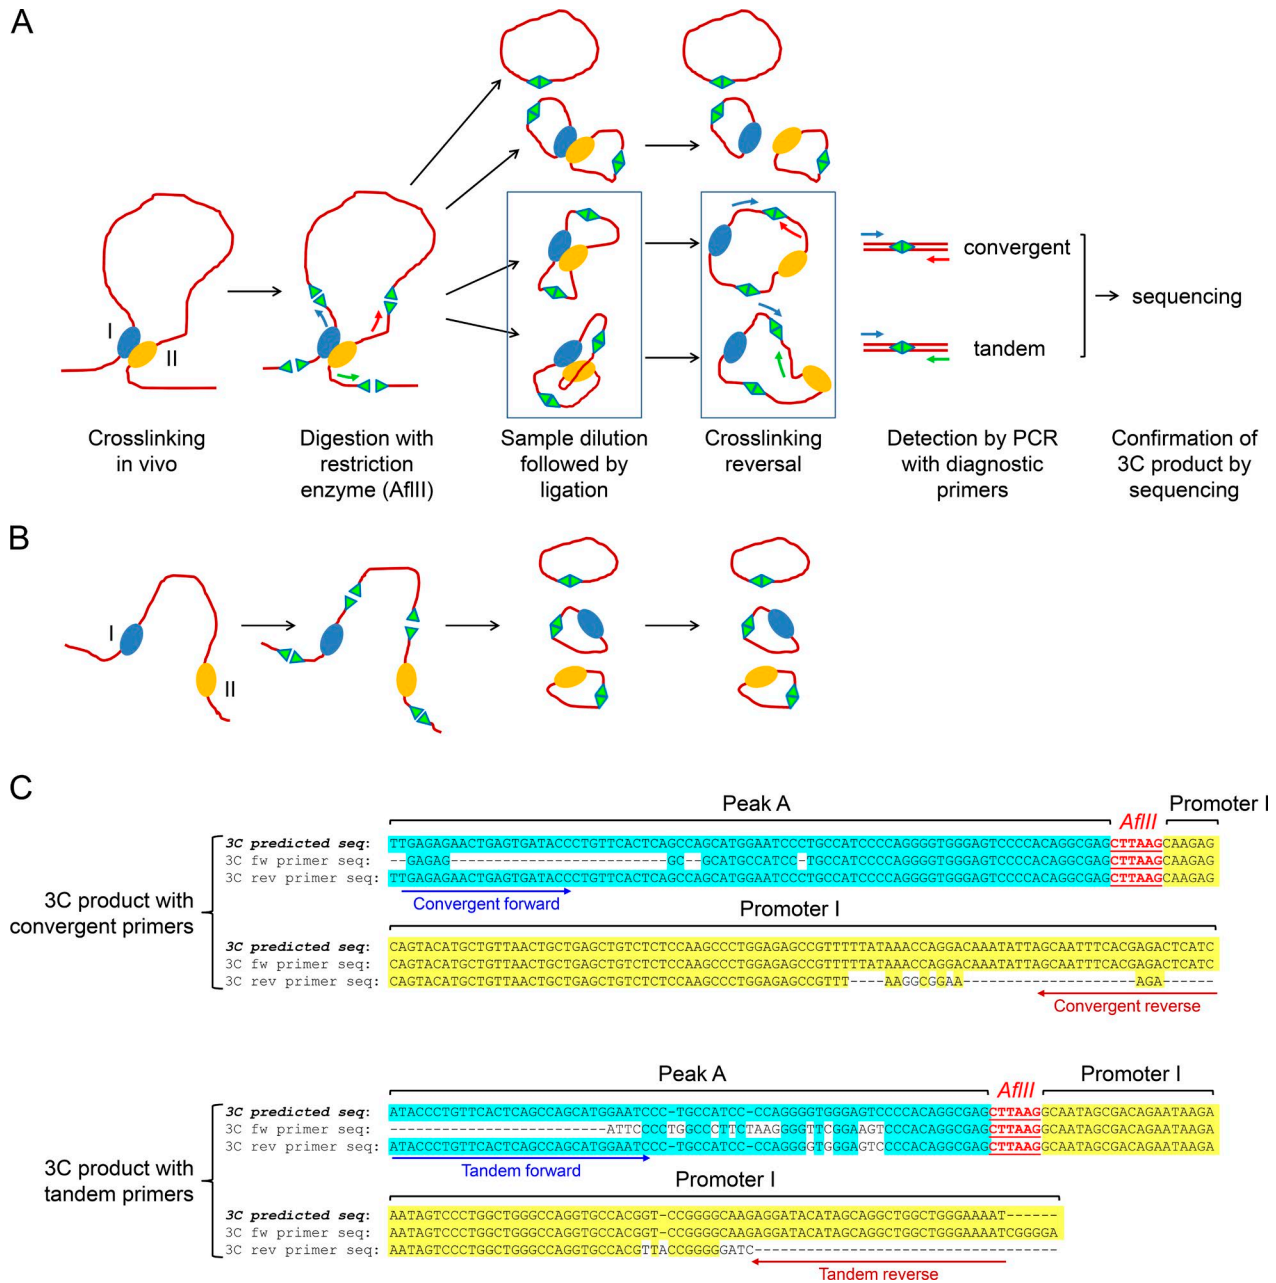

Figure S5. **3C assay between peak A and promoter I. (A and B)** Schematic diagram of the 3C assay. In A, genomic regions I and II (such as peak A enhancer and *Ciita* promoter I) are brought together in vivo by the action of chromatin regulators or transcription factors, such as NFAT5. Upon cross-linking, digestion with a specific restriction enzyme (in this case AflIII, indicated by small triangles), and ligation, they will yield a mixture of ligated products, some of which would occur only if regions I and II were initially juxtaposed (represented in the boxes). These can be identified by PCR with diagnostic convergent or tandem primers and confirmed by sequencing. In B, regions I and II are not interacting, and the 3C assay will not produce ligated products amplifiable with the diagnostic primers. **(C)** Comparison of the predicted sequence of the expected 3C product and the sequence of the PCR products obtained with convergent or tandem primers in the 3C assay shown in Fig. 5 D with wild-type BMDMs. Sequences of 3C products with both forward and reverse primers show extensive alignment with peak A (blue overlay) and *Ciita* promoter I (yellow overlay) regions, respectively upstream and downstream of the *AflIII* site (marked in red underlined). Positions of forward and reverse sequencing primers are indicated with arrows.



Table S1. Microarray analysis of mRNA expression of histocompatibility and T cell costimulation genes in wild-type and NFAT5-deficient BMDMs

| Gene name                   | Fold change  | P value         | Adjusted P value | Gene name           | Fold change | P value  | Adjusted P value |
|-----------------------------|--------------|-----------------|------------------|---------------------|-------------|----------|------------------|
| <b>MHCII-related</b>        |              |                 |                  | <i>Cd86</i> (B7.2)  | 0.799       | 0.217000 | 0.9993           |
| <i>Clita</i>                | <b>0.272</b> | <b>0.000004</b> | <b>0.0100</b>    | <b>MHCI-related</b> |             |          |                  |
| <i>Cd74</i>                 | <b>0.386</b> | <b>0.000010</b> | <b>0.0180</b>    | <i>B2m</i>          | 0.892       | 0.101000 | 0.9993           |
| <i>H2-Aa</i>                | <b>0.206</b> | <b>0.000004</b> | <b>0.0104</b>    | <i>H2-D1</i>        | 0.930       | 0.340000 | 0.9993           |
| <i>H2-Ab1</i>               | <b>0.285</b> | <b>0.000007</b> | <b>0.0138</b>    | <i>H2-K1</i>        | 0.744       | 0.002940 | 0.5052           |
| <i>H2-Eb1</i>               | <b>0.244</b> | <b>0.000016</b> | <b>0.0247</b>    | <i>H2-M1</i>        | 0.906       | 0.200000 | 0.9993           |
| <i>H2-DMa</i>               | <b>0.324</b> | <b>0.000101</b> | <b>0.0909</b>    | <i>H2-M10.1</i>     | 0.976       | 0.753000 | 0.9993           |
| <i>H2-DMb1/2</i>            | <b>0.448</b> | <b>0.000511</b> | <b>0.2141</b>    | <i>H2-M10.2</i>     | 0.945       | 0.565000 | 0.9993           |
| <i>H2-Eb2</i>               | 0.921        | 0.458000        | 0.9993           | <i>H2-M10.3</i>     | 0.937       | 0.548000 | 0.9993           |
| <i>Btn2a2</i>               | 1.103        | 0.317000        | 0.9993           | <i>H2-M10.4</i>     | 0.942       | 0.751000 | 0.9993           |
| <i>Creb1</i>                | 0.982        | 0.836000        | 0.9993           | <i>H2-M10.5</i>     | 0.964       | 0.704000 | 0.9993           |
| <i>Nfya</i>                 | 1.118        | 0.241000        | 0.9993           | <i>H2-M10.6</i>     | 0.963       | 0.640000 | 0.9993           |
| <i>Nfyb</i>                 | 0.833        | 0.082000        | 0.9993           | <i>H2-M11</i>       | 0.867       | 0.080300 | 0.9993           |
| <i>Nfyc</i>                 | 0.909        | 0.282000        | 0.9993           | <i>H2-M2</i>        | 0.835       | 0.196000 | 0.9993           |
| <i>Rfx1</i>                 | 0.986        | 0.884000        | 0.9993           | <i>H2-M3</i>        | 0.657       | 0.000645 | 0.2517           |
| <i>Rfx2</i>                 | 0.942        | 0.425000        | 0.9993           | <i>H2-M5</i>        | 0.914       | 0.203000 | 0.9993           |
| <i>Rfx3</i>                 | 0.947        | 0.678000        | 0.9993           | <i>H2-M9</i>        | 0.966       | 0.666000 | 0.9993           |
| <i>Rfx4</i>                 | 0.980        | 0.823000        | 0.9993           | <i>H2-Q1</i>        | 0.927       | 0.340000 | 0.9993           |
| <i>Rfx5</i>                 | 0.931        | 0.553000        | 0.9993           | <i>H2-Q10</i>       | 0.975       | 0.760000 | 0.9993           |
| <i>Rfx6</i>                 | 1.031        | 0.787000        | 0.9993           | <i>H2-Q2</i>        | 0.921       | 0.517000 | 0.9993           |
| <i>Rfx7</i>                 | 0.804        | 0.203100        | 0.9993           | <i>H2-Q5</i>        | 0.655       | 0.047800 | 0.9993           |
| <i>Rfx8</i>                 | 1.011        | 0.926000        | 0.9993           | <i>H2-Q6</i>        | 0.811       | 0.029000 | 0.9993           |
| <i>Rfxap</i>                | 0.972        | 0.629000        | 0.9993           | <i>H2-Q8</i>        | 0.736       | 0.023600 | 0.9912           |
| <i>Rfxank/Nr2c2ap</i>       | 0.860        | 0.185000        | 0.9993           | <i>H2-T10</i>       | 0.696       | 0.015100 | 0.8701           |
| <b>T cell costimulation</b> |              |                 |                  | <i>H2-T23</i>       | 0.714       | 0.010600 | 0.7926           |
| <i>Itgal</i> (CD11a)        | 0.862        | 0.333000        | 0.9993           | <i>H2-T24</i>       | 0.458       | 0.001340 | 0.3670           |
| <i>Itgb2</i> (CD18)         | 0.902        | 0.150000        | 0.9993           | <i>H2-T3</i>        | 0.898       | 0.290000 | 0.9993           |
| <i>Icam1</i>                | 0.988        | 0.916000        | 0.9993           | <i>H2-T9</i>        | 0.802       | 0.092600 | 0.9993           |
| <i>Icam2</i>                | 0.984        | 0.817000        | 0.9993           | <i>Tap1</i>         | 0.529       | 0.000526 | 0.2175           |
| <i>Cd40</i>                 | 0.725        | 0.005820        | 0.6438           | <i>Tap2</i>         | 0.792       | 0.013300 | 0.8454           |
| <i>Cd80</i> (B7.1)          | 0.836        | 0.274000        | 0.9993           | <i>Tapbp</i>        | 0.784       | 0.048200 | 0.9993           |

Results correspond to four independent macrophage samples of each mouse genotype. Genes marked in bold showed reduced expression in NFAT5-deficient macrophages. The accession number for this set of data is GSE26343.

Table S2. Primers used

| Gene, gene region, primer, gRNA sequence, or diagnostic primer | Forward (5'-3')                         | Reverse (5'-3')                         |
|----------------------------------------------------------------|-----------------------------------------|-----------------------------------------|
| <b>mRNA analysis by RT-qPCR (gene)</b>                         |                                         |                                         |
| <i>Nfat5</i>                                                   | CAGCCAAAAGGGAAGTGGAG                    | GAAAGCCTTGCTGTGTCTG                     |
| <i>Ciita</i>                                                   | AGGCCTATGCCAACATTGCG                    | CCATAGCATGCTCTCCGGG                     |
| <i>Ciita Exons 16-18</i>                                       | TGGTGTGATGGATGTCCAG                     | CCAAAGGGGATAGTGGGTGTC                   |
| <i>Ciita-pl</i>                                                | ACAGGGACCATGGAGACCATAG                  | GGTCCGCATCACTGTTAAGG                    |
| <i>Ciita-pIII</i>                                              | GCCGGAGTTGCAAGACCATAG                   | GGTCCGCATCACTGTTAAGG                    |
| <i>Ciita-pIV</i>                                               | GAGACTGCATGCAGGCAGCAC                   | GGTCCGCATCACTGTTAAGG                    |
| <i>Cd74</i>                                                    | TTGCTGATGCGTCCAATGTC                    | GGTCCATGTTGCCGACTTG                     |
| <i>H2-Aa</i>                                                   | AGGTGAAGACGACATTGAGG                    | AACTCAGGAAGCATCCAGAC                    |
| <i>H2-Ab</i>                                                   | CCATTACCTGTGCCTTAGAG                    | GAAGTGTACACGAAATGCC                     |
| <i>H2-DMb1</i>                                                 | AGCCTTCTCCAGCGTTTGC                     | TTTGGCTACTCGGACAGATG                    |
| <i>H2-K1</i>                                                   | CGCTGATCACCAACACAAGTG                   | CAGCACCTCAGGGTGACTTTATC                 |
| <i>CREB1</i>                                                   | TCAAGCCCAGCCACAGATTG                    | ATTGGCAGCTGCACTAAGG                     |
| <i>NF-YA</i>                                                   | AAGTCCAGACCCTCCAGGTAG                   | GGCACAGCCTGTACCATGATG                   |
| <i>Rfx5</i>                                                    | GCAGAGCGTCTATGATGCCTATC                 | GCCTTGATGTGAGGGAAGATCTC                 |
| <i>Nubp1</i>                                                   | CGTTGGGAAAAGCAGGTTTCCAG                 | TGGCCACAGATATCGATGTC                    |
| <i>Tvp23a</i>                                                  | AGCCAGAAAGGTCTCTGCAAAC                  | CAGATCACTGGGAGATGATGAG                  |
| <b>ChIP (gene region)</b>                                      |                                         |                                         |
| <i>H2-Aa</i> promoter                                          | AGGTGGATCATCTCACAATTTGG                 | GCTTGCATGCATCATGAGTTAGC                 |
| <i>H2-Ab</i> promoter                                          | AGGAGAGGCTGCAGATTATTG                   | AGCAGACAAACATGGCCATTC                   |
| <i>Ciita</i> promoter I                                        | CTGCACCCGAATGAGGAAAC                    | AGCCTTGAGCATCCAAAC                      |
| <i>Ciita</i> peak A                                            | GGTGGTGACATCGCTGTATGAC                  | TCTCCTCCACACAGGCTTGAG                   |
| <i>Ciita</i> exon 2                                            | AGAGGGCAGCTACCTGGAATC                   | GCCAGTCCATCTGGTCATAG                    |
| <b>3C (primer)</b>                                             |                                         |                                         |
| Convergent                                                     | TGAGAGAACTGAGTGATACC                    | GATGAGTCTCGTGAATTTGC                    |
| Tandem                                                         | ATACCCTGTTCACTCAGCCAGCATGGAATC          | ATTTTCCAGCCAGCCTGCTATGTATCCTC           |
| Ligation control                                               | TGGGTTTGTGCACATGAATGAAGGTGTCTG          | CTCACCCGAATGATGATGAC                    |
| Loading control                                                | GGTGGTGACATCGCTGTATGAC                  | TCTCCTCCACACAGGCTTGAG                   |
| <b>CRISPR-Cas9 genome editing</b>                              |                                         |                                         |
| gRNA sequences                                                 | CATTGCAGCTGGATACCAG (gRNA1-target site) | ACTGAGACAGTAACGGCCA (gRNA2-target site) |
| Diagnostic primers                                             | GTGGTATCCTGGTGCCTTGTG (Fwd1)            | TGTCTCCTCCACACAGGCTTGAG (Rev1)          |
|                                                                | AGTTGGTCATTGCAGCTGGATAC (Fwd2)          | ATCTTGGGAGGCTGACATTTTG (Rev2)           |
